# Supplementary figures and images for: High expression of YEATS2 as a predictive factor of poor prognosis in patients with hepatocellular carcinoma
Source: PubMed Central journal article supplement — Sci Rep. 2024 Jul 27;14:17246. doi: 10.1038/s41598-024-68348-0 (PMC11282058; doi:10.1038/s41598-024-68348-0), 2024-07-27

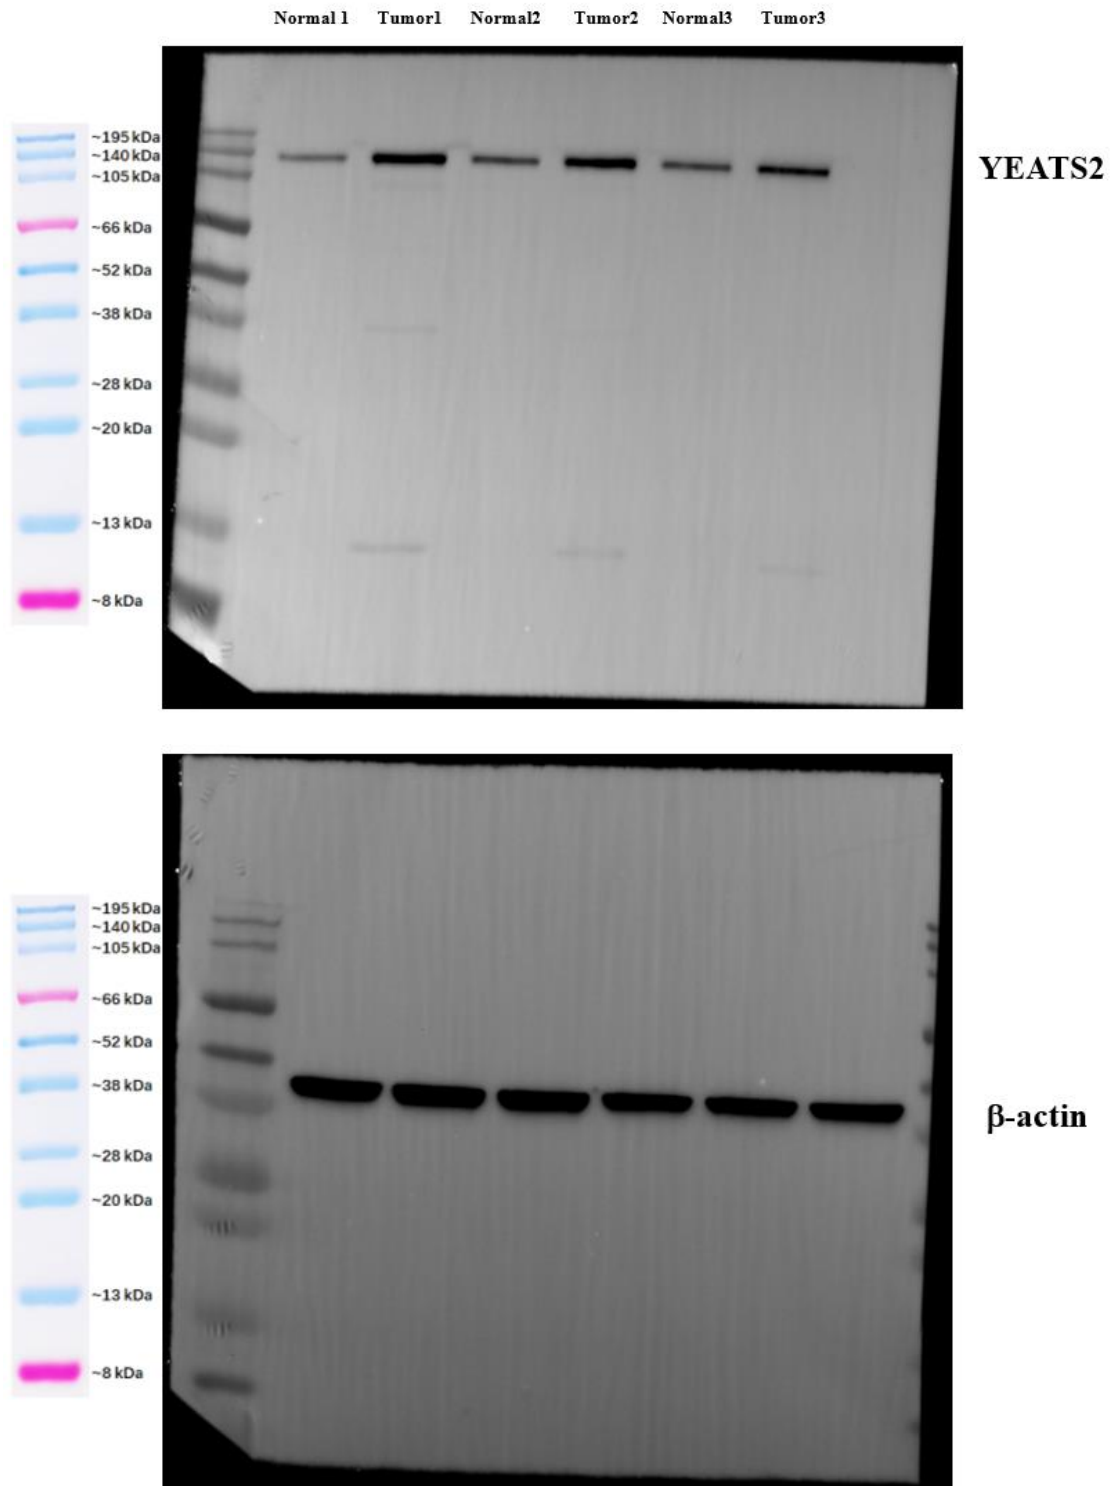

**Figure S1.** Western blot analysis revealed the presence of YEATS2 in HCC tumors and normal tissue.

Supplement: 41598_2024_68348_MOESM1_ESM.pdf [file 41598_2024_68348_MOESM1_ESM.pdf]
